# Supplementary material for: Adolescent Attachment to Parents and Peers and the Use of Instagram: The Mediation Role of Psychopathological Risk
Source: Int J Environ Res Public Health. 2021 Apr 9;18(8):3965. doi: 10.3390/ijerph18083965 (PMC8069955; doi:10.3390/ijerph18083965)
Supplement: Supplementary file 1 [file ijerph-18-03965-s001.pdf]

## Supplementary Materials

Table S1. The Bergen Instagram Addiction Scale: Items and Intercorrelations of Ratings

| Item                     |                                                                               | Item-total correlation |
|--------------------------|-------------------------------------------------------------------------------|------------------------|
| <b>Salience</b>          |                                                                               |                        |
| BIAS1                    | Spent a lot of time thinking about Instagram or planned use of Instagram?     | 0.524                  |
| <b>Tolerance</b>         |                                                                               |                        |
| BIAS2                    | Felt an urge to use Instagram more and more?                                  | 0.723                  |
| <b>Mood modification</b> |                                                                               |                        |
| BIAS3                    | Used Instagram in order to forget about personal problems?                    | 0.578                  |
| <b>Relapse</b>           |                                                                               |                        |
| BIAS4                    | Tried to cut down on the use of Instagram without success?                    | 0.607                  |
| <b>Withdrawal</b>        |                                                                               |                        |
| BIAS5                    | Become restless or troubled if you have been prohibited from using Instagram? | 0.649                  |
| <b>Conflict</b>          |                                                                               |                        |
| BIAS6                    | Used Instagram so much that it has had a negative impact on your job/studies? | 0.538                  |

Table S2. Correlations between adolescent's attachment to parents and peers and their psychopathological risk and Internet addiction

|                      | Adolescent Global Severity Index | Instagram Addiction |
|----------------------|----------------------------------|---------------------|
| Attachment to mother | -0.43 **                         | -0.30 **            |
| Attachment to father | -0.41 **                         | -0.21 **            |
| Attachment to peers  | -0.29 **                         | -0.06               |

\*\* $p < 0.001$

Table S3. Correlations between adolescent's psychopathological risk and BIAS total score and items

|                                        | Adolescent Global Severity Index |
|----------------------------------------|----------------------------------|
| Instagram Addiction (BIAS total score) | 0.38 **                          |
| Salience                               | 0.21 **                          |
| Tolerance                              | 0.30 **                          |
| Mood Modification                      | 0.37 **                          |
| Relapse                                | 0.38 **                          |
| Withdrawal                             | 0.25 **                          |
| Conflict                               | 0.29 **                          |

\*\*  $p < 0.001$
